# Supplementary material for: Bright and sensitive red voltage indicators for imaging action potentials in brain slices and pancreatic islets
Source: PubMed Central journal article supplement — Sci Adv. 2023 Nov 22;9(47):eadi4208. doi: 10.1126/sciadv.adi4208 (PMC10664999; doi:10.1126/sciadv.adi4208), 2023-11-22
Supplement: sciadv.adi4208_sm.pdf [file sciadv.adi4208_sm.pdf]

Supplementary Materials for  
**Bright and sensitive red voltage indicators for imaging action potentials in  
brain slices and pancreatic islets**

Yi Han *et al.*

Corresponding author: Peng Zou, [zoupeng@pku.edu.cn](mailto:zoupeng@pku.edu.cn); Junqi Yang, [yjunqi@pku.edu.cn](mailto:yjunqi@pku.edu.cn)

*Sci. Adv.* **9**, eadi4208 (2023)  
DOI: 10.1126/sciadv.adi4208

**This PDF file includes:**

Figs. S1 to S17  
Tables S1 to S6

## Supplementary Figures

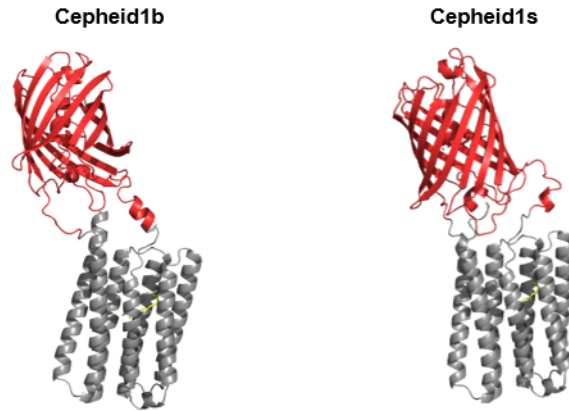

**Fig. S1. Predicted tertiary structures of Cepheid1b and Cepheid1s by AlphaFold2.** Retinal and RFP fluorophore are added by manual alignment with crystallography data in RCSB PDB.

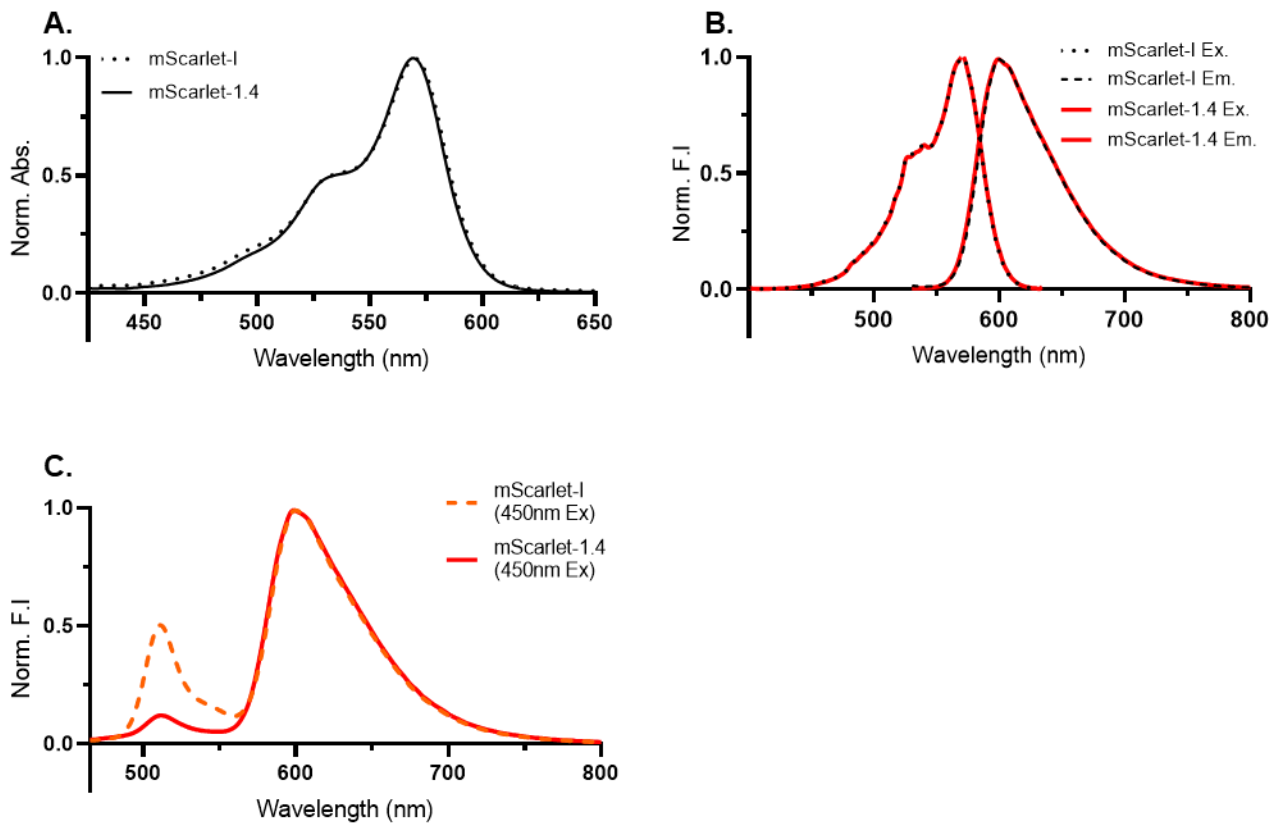

**Fig. S2. Spectra of mScarlet-I1.4 and mScarlet-I.** (A) Normalized absorption spectra. (B) Normalized excitation and emission spectra (right). (C) Normalized emission spectra of mScarlet-I and mScarlet-I.4 excited with 450 nm (10 nm bandwidth) light.

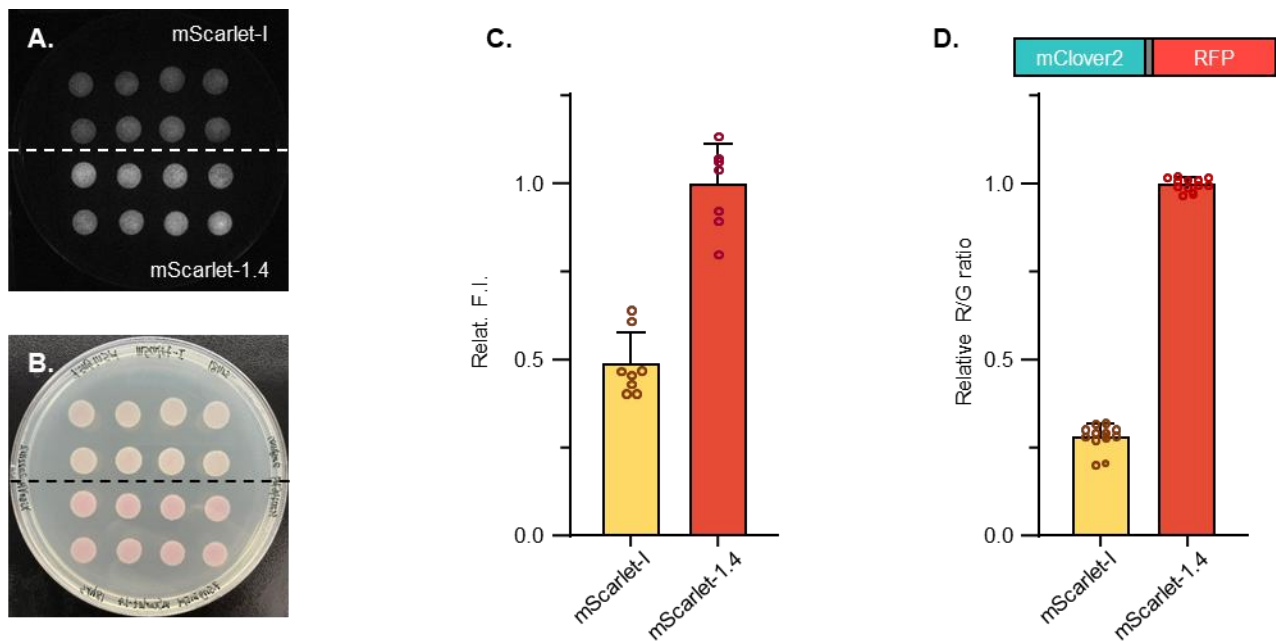

**Fig. S3. Brightness comparison of mScarlet-I1.4 to mScarlet-I in E.coli.** (A) Red channel image of E.coli transfected with the same amount of pNCs\_mScarlet-I or pNCs\_mScarlet-I1.4 plasmids and cultured under 34 °C for 12 hr. (B) LED illuminated brightfield image of the same petri dish in A. (C) Relative red channel fluorescent intensity of E.coli, mScarlet-I1.4 is about 1 fold brighter than mScarlet-I, (D) Clover2 were fused to the N terminal of mScarlet-I and mScarlet-I1.4 with the same flexible linker, both of these fused FPs were cloned into pNCs vector and introduced into E.coli, after 12 hr culture under 34 °C in solid LB plate bacterial colonies were suspended in PBS and measured with microplate reader (Tecan M1000pro).

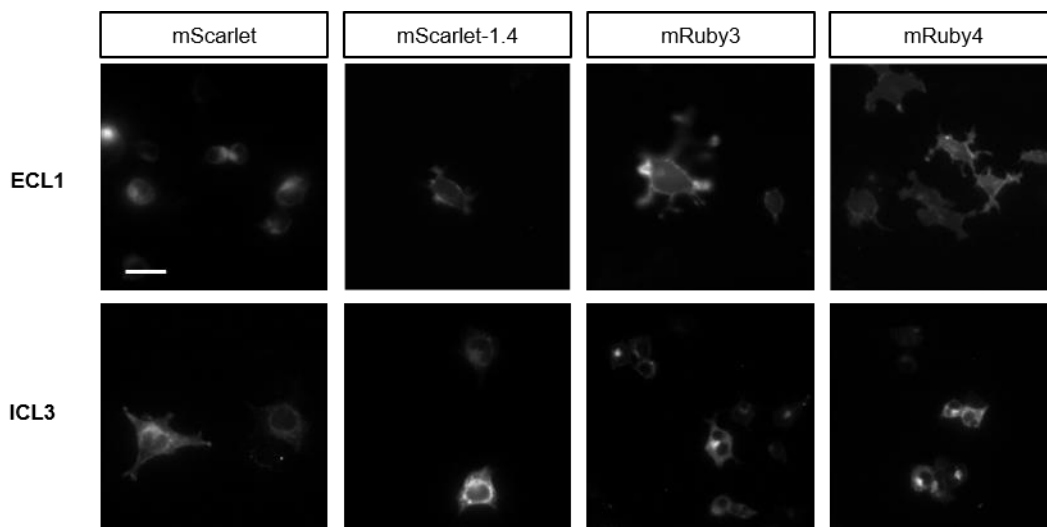

**Fig. S4. Epifluorescence images showing expression and trafficking of extracellular loop1 (ECL1) inserted variants.** Scale bar = 20  $\mu$ m.

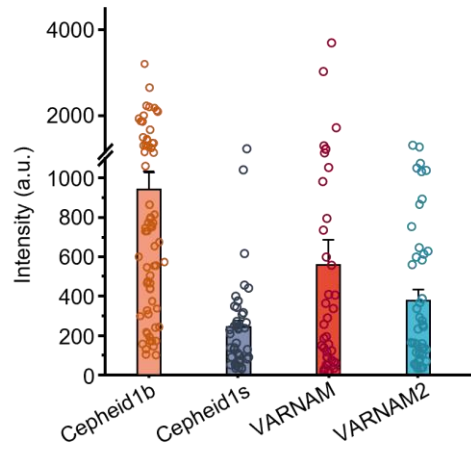

**Fig. S5. Brightness of Cepheid indicators and VARNAM series.** Each data point indicates the average photon count number in one cell, under wide field epifluorescence imaging with 561 nm laser.

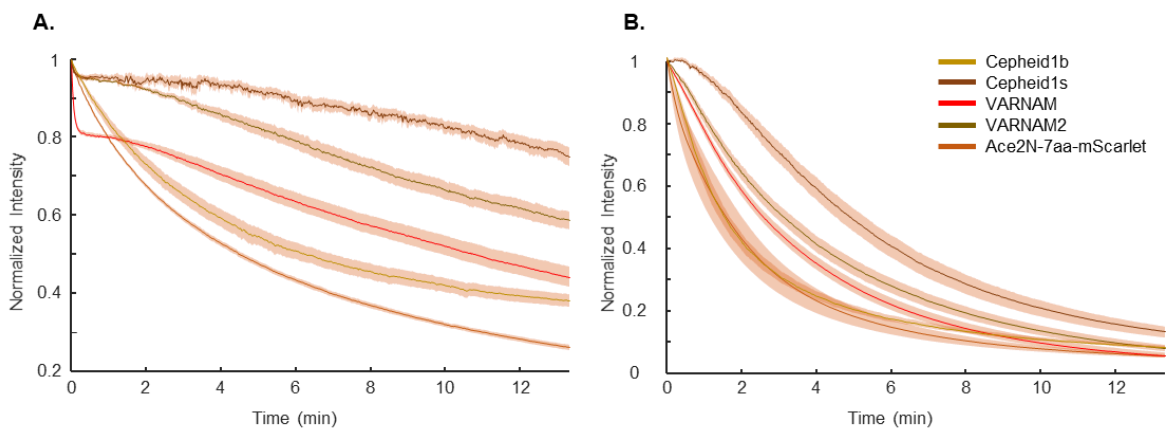

**Fig. S6. Photostability comparison of Cepheid1 and other red GEVIs.** (A) 1.59 W/cm<sup>2</sup> 561 nm laser illumination (n = 7, 7, 6, 6, 5 cells). (B) 7.95 W/cm<sup>2</sup> 561 nm laser illumination (n = 7, 7, 7, 6, 5 cells).

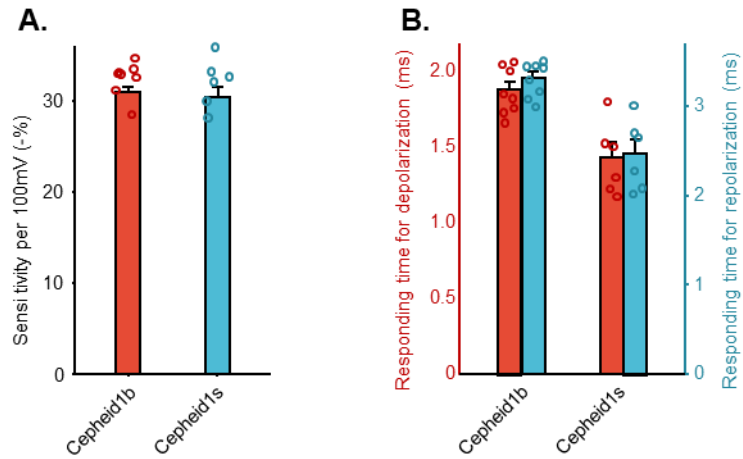

**Fig. S7. Characteristics of Cepheid1 voltage response sensitivity and kinetics in HEK293T cells. (A)** Sensitivity of Cepheid1b and Cepheid1s to 100 mV (-70 mV to +30 mV). **(B)** Kinetics of Cepheid1b and Cepheid1s to depolarization (-70 mV to +30 mV) and to repolarization (+30 mV to -70 mV).

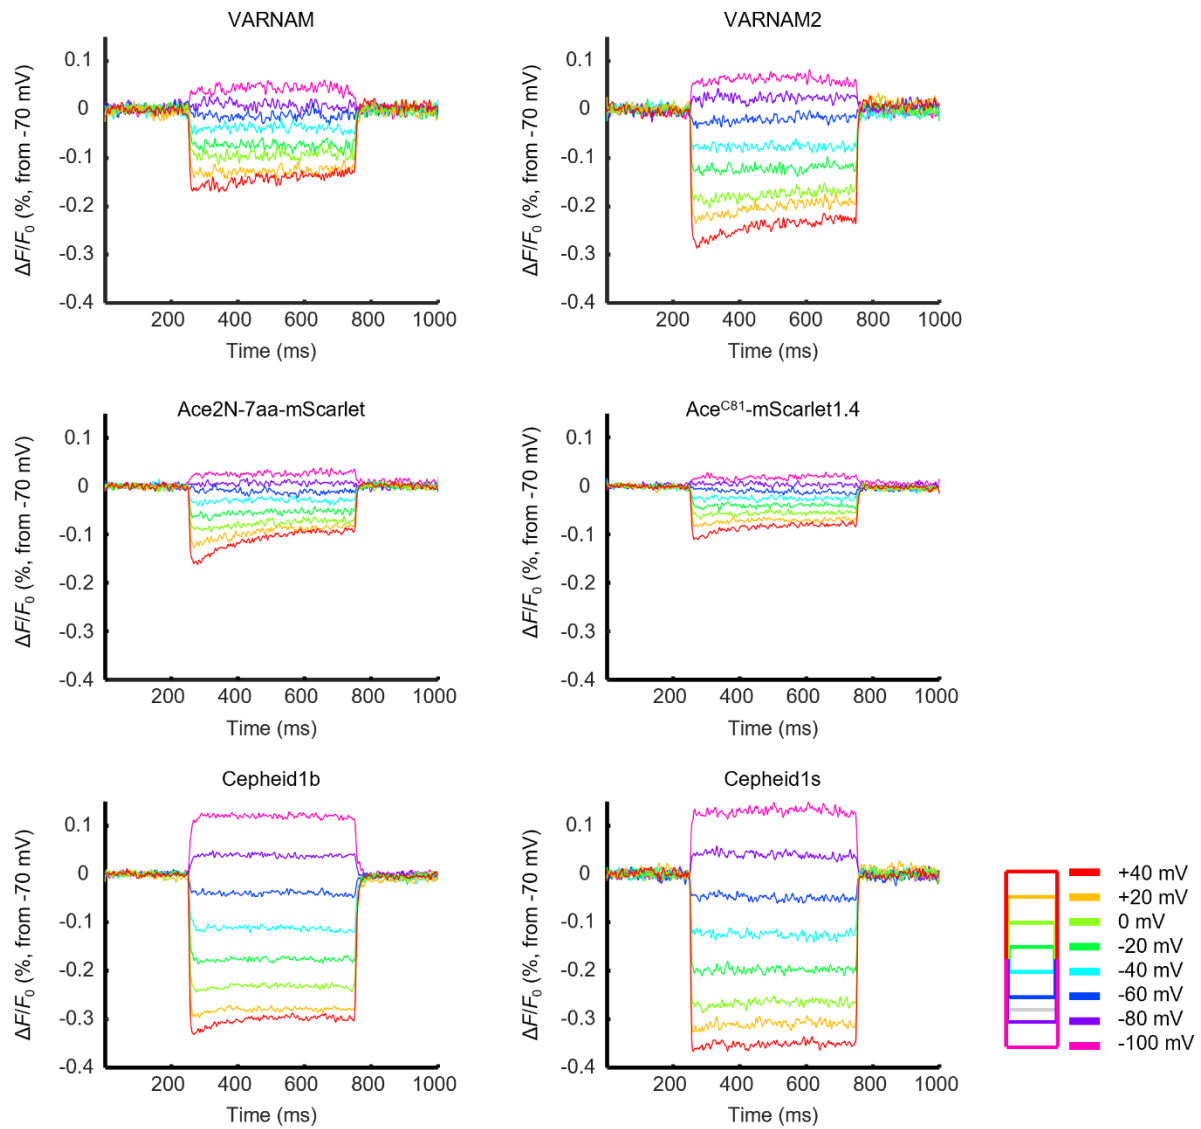

**Fig. S8. Representative fluorescence traces of red GEVIs in response to a series of voltage steps.** The membrane potential was controlled via whole-cell voltage clamp, and a series of step waveforms were applied from  $-100$  mV to  $40$  mV in increments of  $20$  mV). The dynamic range has been normalized to the fluorescence at membrane voltage  $V_m = 70$  mV.

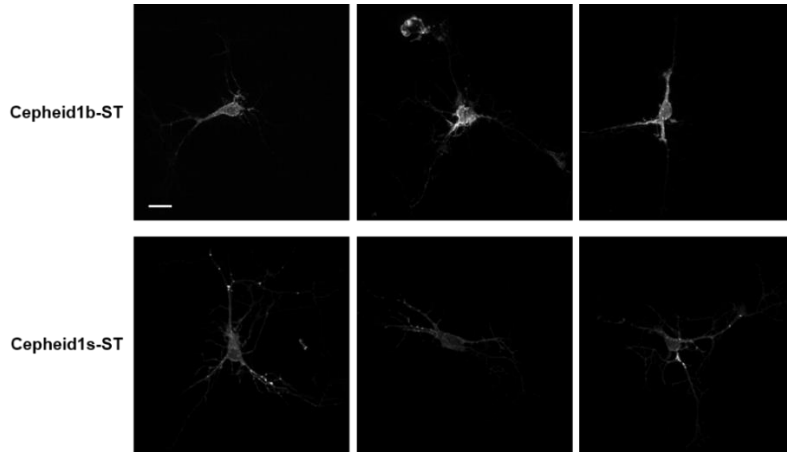

**Fig. S9. Localization of Cepheid1b/s-ST in cultured neurons.** Images acquired by confocal Z projection. Scale bar = 20  $\mu\text{m}$ .

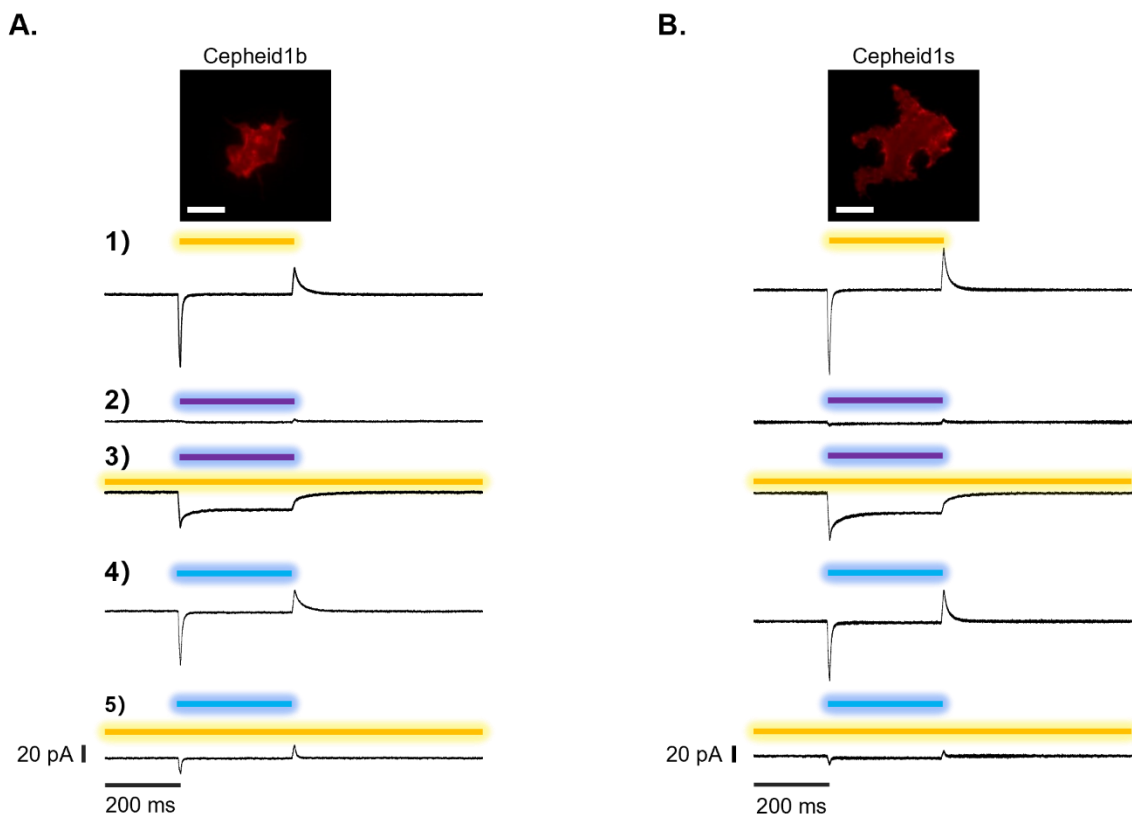

**Fig. S10. Photocurrent of Cepheid1b and Cepheid1s.** Photocurrent of HEK293T cells expressing Cepheid1b (A) and Cepheid1s (B) measured in different illumination conditions. Top: epifluorescence images of GEVI-expressing HEK293T cells. Bottom: photocurrent elicited by illumination or co-illumination at 561 nm (1.6 to 1.7  $\text{W}/\text{cm}^2$ , yellow bar), 405 nm (1.6  $\text{W}/\text{cm}^2$ , purple bar) and 488 nm (3.9 to 4.3  $\text{W}/\text{cm}^2$ , blue bar). Scale bar = 20  $\mu\text{m}$ .

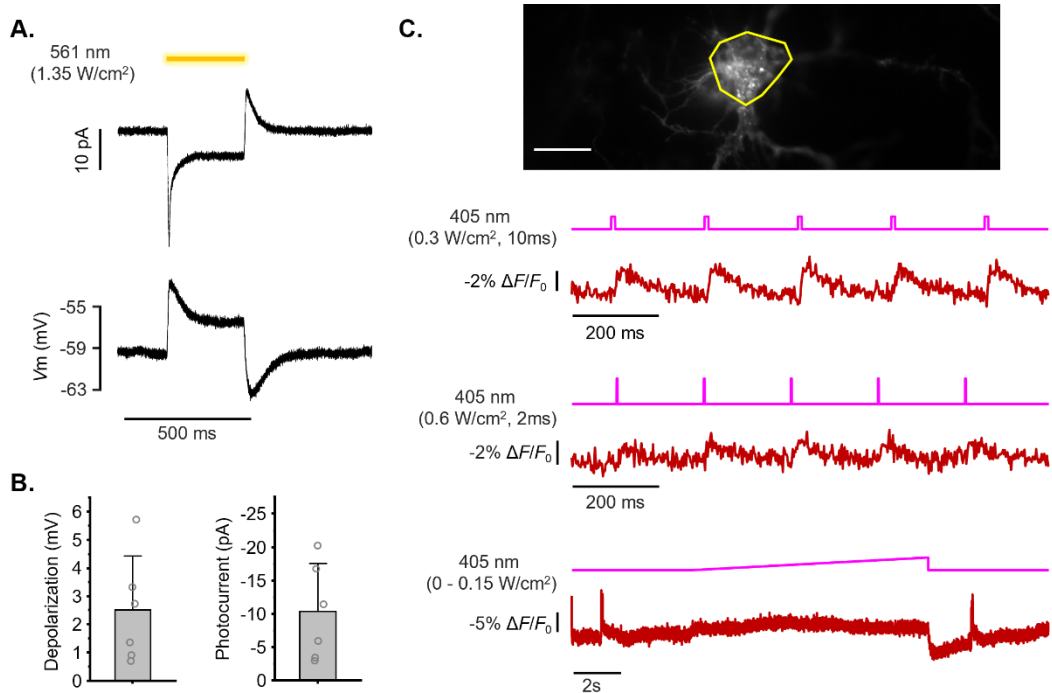

**Fig. S11. Optical crosstalk in all-optical electrophysiology experiments. (A-B)** Neuron expressing Cepheid1b-ST-P2A-CheRiff was illuminated with 561 nm laser at imaging intensity, while photocurrent and depolarization were recorded via whole-cell patch clamp. Example trail-averaged traces **(A)** and statistics **(B)** are shown. **(C)** Top, example of a neuron expressing Cepheid1s-ST; yellow circle is the ROI, and scale bar is 20  $\mu$ m. Below, red fluorescence artifact caused by 405 nm illumination.

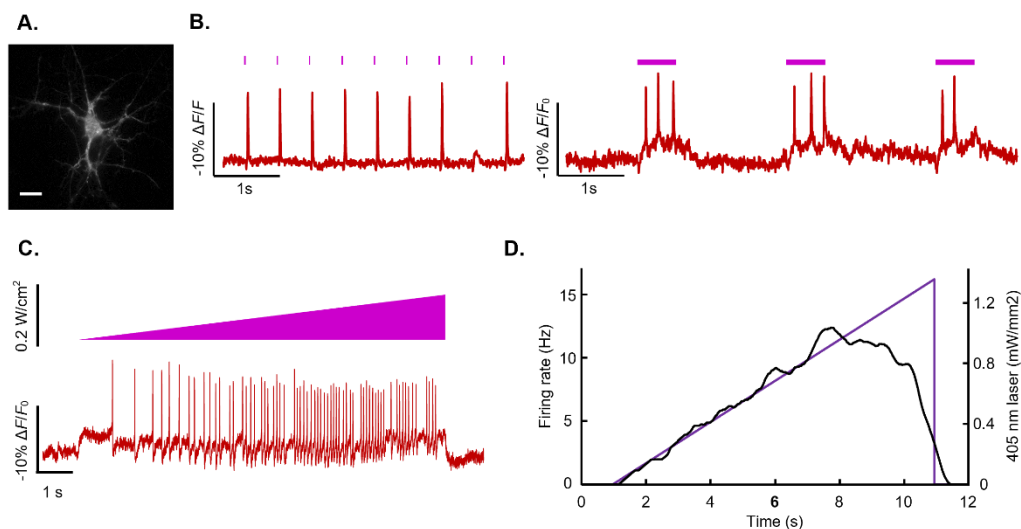

**Fig. S12. All-optical electrophysiology in cultured neurons. (A)** Epifluorescence images showing expression of Cepheid1s-ST in a neuron transfected with Cepheid1s-ST-P2A-CheRiff (scale bar = 20  $\mu$ m). **(B)** APs triggered by 405 nm pulse illumination, recorded by Cepheid1s-ST under wide field illumination with 561 nm laser. **(C)** APs triggered by 405 nm ramp illumination and recorded by Cepheid1s-ST. **(D)** Firing rate in the trial in **(C)** aligned with stimulation intensity.



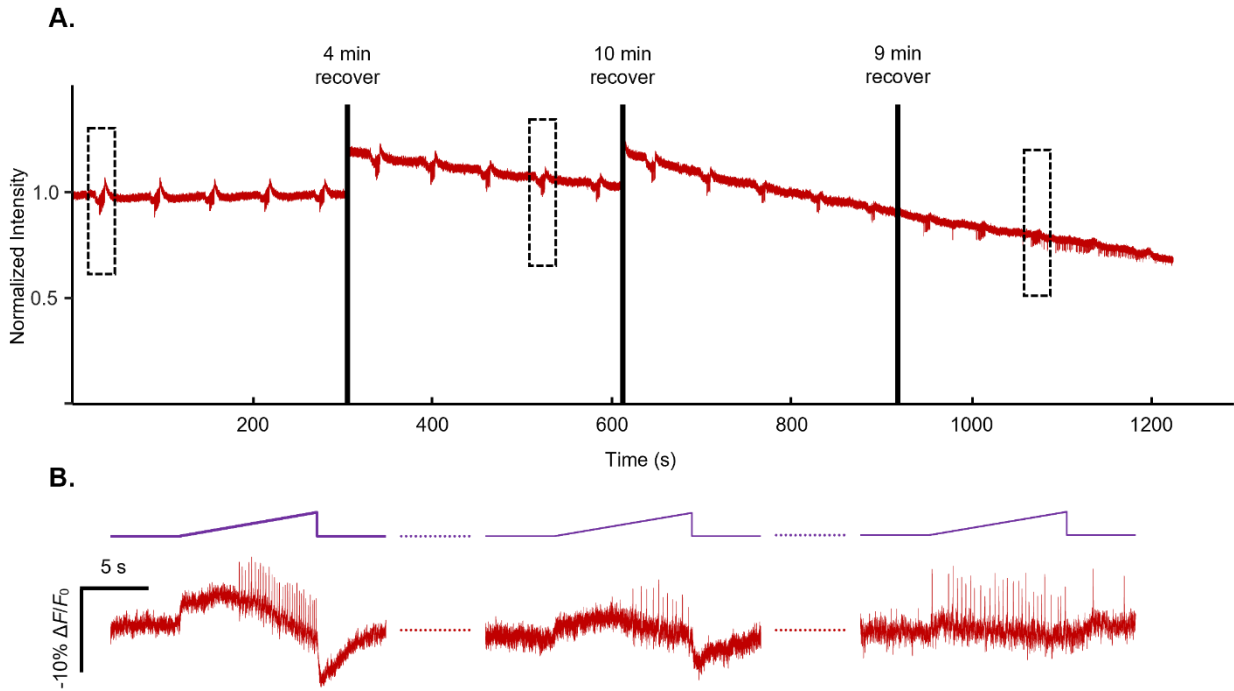

**Fig. S13. long term optical recording under photo-activation of CheRiff. (A)** Photobleaching curve of the long-term imaging with Cepheid1s-ST. 10 s-long, ramp-shaped stimulation is conducted every 60s. The cultured neuron was recovered for 3-10 min in dark after a 300 s imaging. **(B)** Below, zoomed-in traces (red) of selected stimulation sessions in the dotted box in **(A)**, in alignment with optogenetic stimulation intensity patterns (magenta).

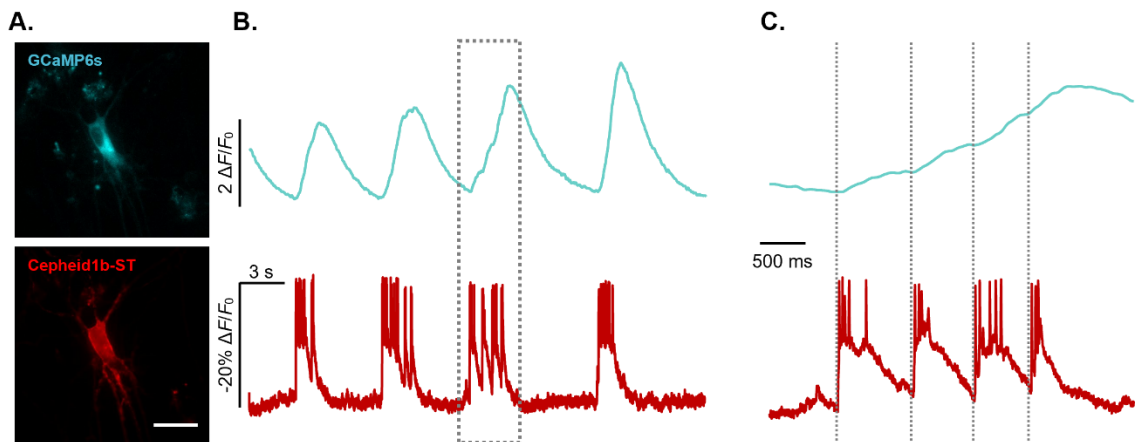

**Fig. S14. Dual-color imaging using GCaMP6s and Cepheid1b-ST. (A)** Epifluorescence image of a neuron expressing GCaMP6s and Cepheid1b-ST. Scale bar, 20  $\mu\text{m}$ . **(B)** Calcium and voltage activity in the same neuron. **(C)** A zoomed in view of fluorescence traces in the dashed gray box in **(B)**.

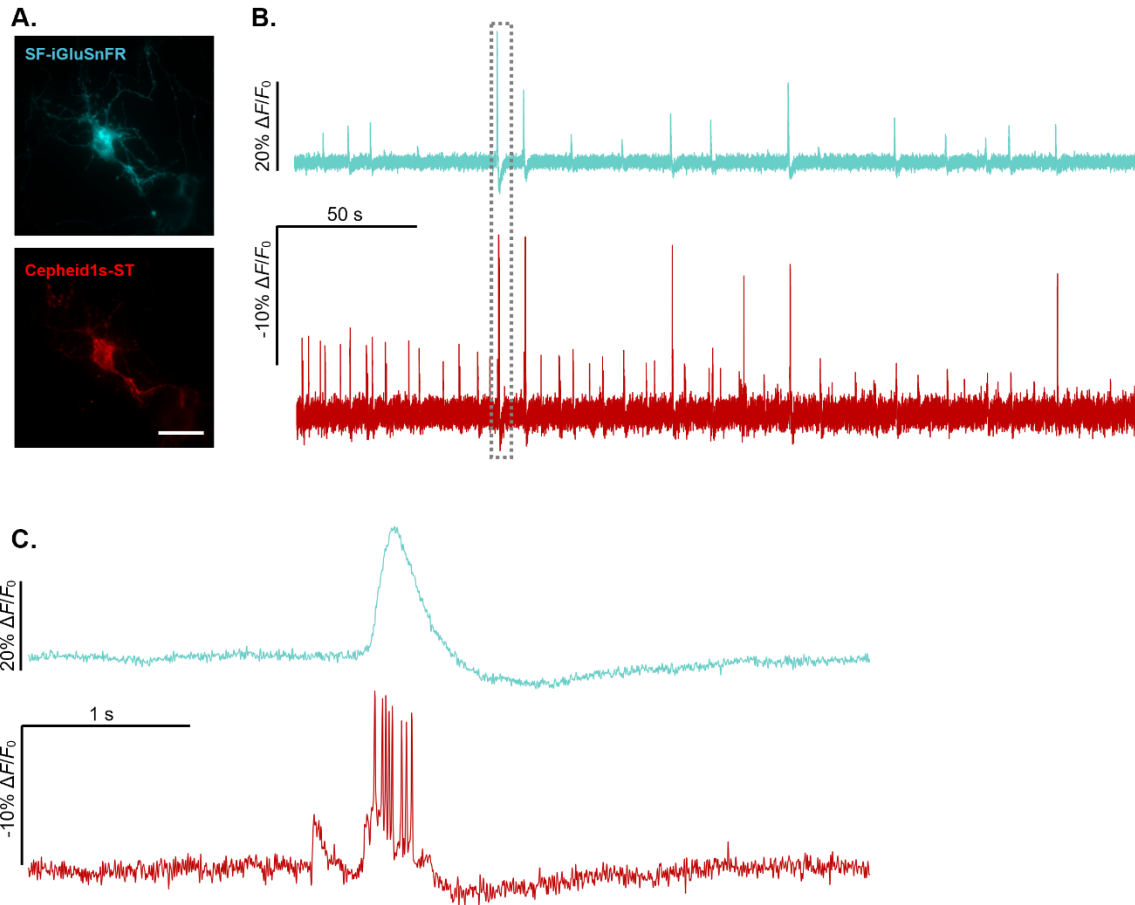

**Fig. S15. Long-term optical recording of glutamate events and electrophysiology.** (A) Epifluorescence image of a neuron expressing SF-iGluSnFR and Cepheid1b-ST. Scale bar, 20  $\mu\text{m}$ . (B) Glutamine and voltage activity in the same neuron. (C) A zoomed in view of fluorescence traces in the dashed gray box in (B).

**A.**

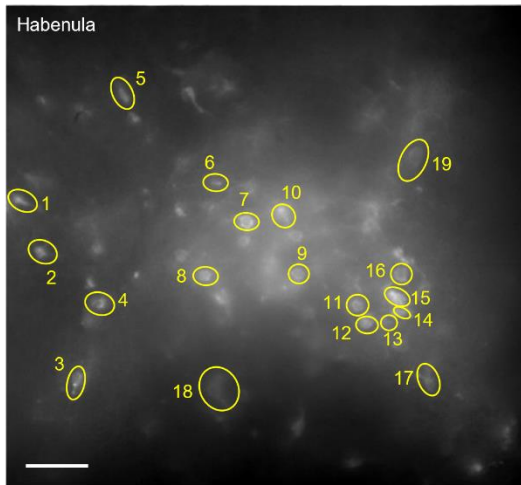

**B.**

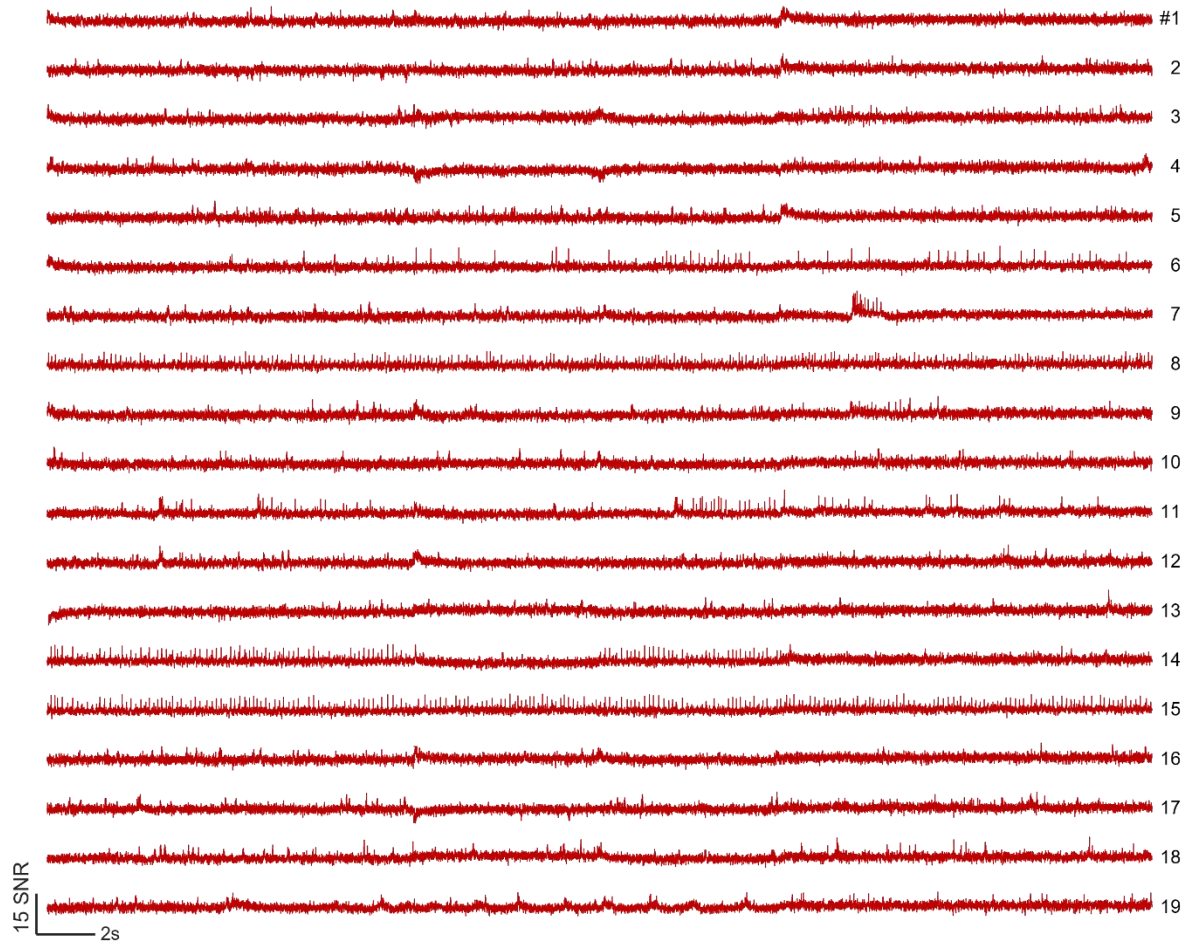

**Fig. S16. Imaging of neuronal firing in a large field of view of habenula with Cepheid1b-ST. (A)** Epifluorescence images of habenula, scale bar = 20  $\mu\text{m}$ . **(B)** Voltage imaging of spontaneous neural activity in habenula.

A.

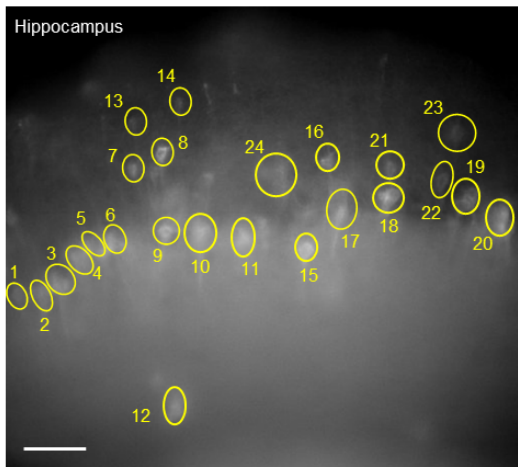

B.

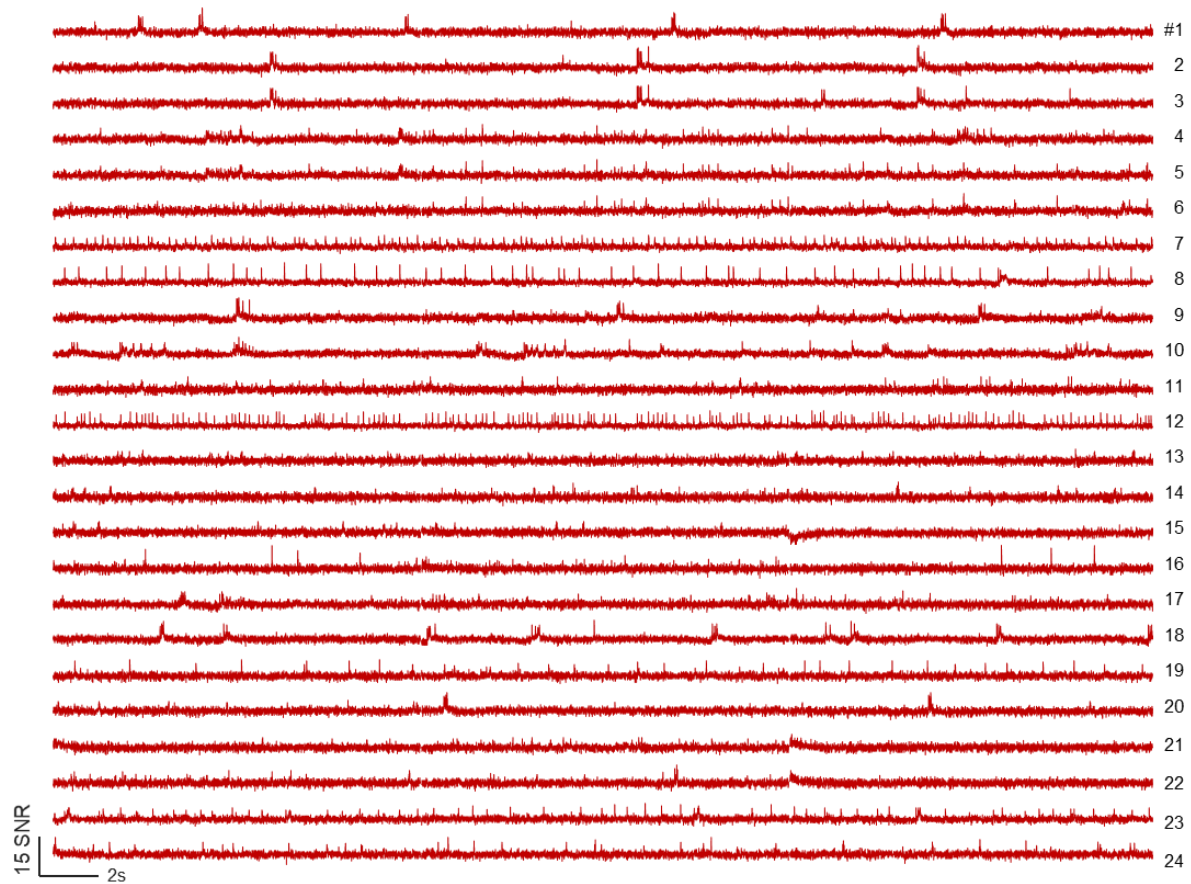

**Fig. S17. Imaging of neuronal firing in a large field of view of hippocampus with Cepheid1b-ST. (A)** Epifluorescence images of hippocampus, scale bar = 20  $\mu\text{m}$ . **(B)** Voltage imaging of spontaneous neural activity in hippocampus.

## Supplementary Tables

**Table S1.** FRET efficiency predictions

|                                         | $R$ (Å) | $\kappa^2$ | $\kappa^2/R^6$ ( $10^{-11}$ Å <sup>-6</sup> ) |
|-----------------------------------------|---------|------------|-----------------------------------------------|
| Ace <sup>81</sup> C-(C)mScarlet-I1.4    | 63      | 0.00026    | 0.00042                                       |
| Ace <sup>81</sup> C-(C)mRuby4           | 52      | 0.0045     | 0.023                                         |
| Ace <sup>81</sup> C-(ECL1)mScarlet-I1.4 | 51      | 0.26       | 1.5                                           |
| Ace <sup>81</sup> C-(ECL1)mRuby4        | 48      | 0.66       | 5.4                                           |
| Ace <sup>81</sup> C-(ICL3)mScarlet-I1.4 | 54      | 0.65       | 2.6                                           |
| Ace <sup>81</sup> C-(ICL3)mRuby4        | 60      | 0.046      | 0.10                                          |

**Table S2.** Photophysical properties of mScarlet-I1.4 compared with mScarlet-I

|                                 | mScarlet-I      | mScarlet-I1.4   |
|---------------------------------|-----------------|-----------------|
| Absorption maximum              | 570 nm          | 570 nm          |
| Excitation maximum              | 571 nm          | 571 nm          |
| Emission maximum                | 511 nm & 600 nm | 512 nm & 600 nm |
| Green/Red emission ratio        | 0.502           | 0.119           |
| Relative brightness in bacteria | 0.489 / 0.301   | 1               |

**Table S3.** List of reagents used in this study

| Reagent                                               | Vendor            | Catalog Number |
|-------------------------------------------------------|-------------------|----------------|
| Phanta <sup>®</sup> Max Super-Fidelity DNA Polymerase | Vazyme            | P505-d2        |
| Lightening Cloning Kit                                | Biodragon         | BDIT0014-100   |
| DNA extraction kit                                    | TIANGEN           | DP118-02       |
| Dulbecco's Modified Eagle's medium (DMEM)             | Gibco             | C11995500BT    |
| Fetal Bovine Serum (FBS)                              | Gibco             | 10099141C      |
| Trypsin-EDTA (0.25%)                                  | Gibco             | 25200056       |
| Neurobasal <sup>™</sup> Medium                        | Gibco             | 21103049       |
| B-27 <sup>™</sup> Supplement                          | Gibco             | 17504044       |
| GlutaMAX <sup>™</sup> Supplement                      | Gibco             | 35050061       |
| Penicillin-streptomycin                               | Beyotime          | C0222          |
| Matrigel <sup>®</sup> Matrix                          | Corning           | 356234         |
| poly-D-lysine                                         | Sigma             | P7280-5X5M     |
| Laminin Mouse Protein                                 | Gibco             | 23017015       |
| Opti-MEM <sup>®</sup> Medium                          | Gibco             | 31985062       |
| Lipofectamine <sup>®</sup> 3000 Reagent               | Gibco             | L3000008       |
| HEPES                                                 | Amresco           | 0511           |
| EGTA                                                  | Sigma             | 03777-10G      |
| 2-APB                                                 | Abcam             | ab120124       |
| Gabazine                                              | Abcam             | ab120042       |
| NBQX                                                  | Abcam             | ab120045       |
| D-AP5 (APV)                                           | Abcam             | ab120003       |
| Creatine Phosphate Sodium                             | Maklin            | C804629        |
| Potassium gluconate                                   | Sigma             | G4500          |
| Adenosine 5'-triphosphate Magnesium                   | Maklin            | A922363        |
| HBSS                                                  | Gibco             | C14175500BT    |
| NaHCO <sub>3</sub>                                    | Tong Guang        | 144-55-8       |
| NaH <sub>2</sub> PO <sub>4</sub> •2H <sub>2</sub> O   | Xilong Scientific | 13472-35-0     |
| NaCl                                                  | Sigma             | S3014          |
| Glucose                                               | Sigma             | G7021          |
| KCl                                                   | Sigma             | P9541          |
| MgCl <sub>2</sub>                                     | Sigma             | M2670          |
| CaCl <sub>2</sub>                                     | Sigma             | 10043-52-4     |

**Table S4.** List of cloning primers used in this study

| <b>Construct</b>             | <b>Primer sequence (5' to 3')</b>                                                                                                      |
|------------------------------|----------------------------------------------------------------------------------------------------------------------------------------|
| Ace (N terminus)             | Forward: ATGGCTGACGTGGAAACCGAG<br>Reverse: CATTGTCAGGTCCTGGTAGTTCACG                                                                   |
| Ace (C terminus)             | Forward: AATGGTCAAAGGCAGGTGGTCTAC<br>Reverse: CTTGAAGATAGTCTCATGGGCAATGAGG                                                             |
| mScarlet-l1.4                | Forward: TACCAGGACCTGACAATGATGGTGAGCAAGGGCGAGG<br>Reverse: CCTGCCTTTCACCATTCTTGACAGCTCGTCCATGCCG                                       |
| mRuby4                       | Forward:<br>CGTGAACCTACCAGGACCTGACAATGCTGATCAAGGAAGAGATGC<br>CCATGAAG<br>Reverse:<br>CGTAGACCACCTGCCTTTCACCATTCTTGACAGCTCGTCCATGC<br>C |
| $\Delta$ 7mOrange2(Y71F)-ER2 | Forward:<br>CATCAATGTGGGGGGCAACATGGCCATCATCAAGGAGTTCATG<br>Reverse:<br>AGCTTGATATCGAATTCTCATTACACCTCGTTCTCGTAGCAGAACT<br>TGTA          |
| 3xTS                         | Forward: CCCATGAGACTATCTTCAAGACCGGTGCCGCCGACCG<br>Reverse: GCCCCCCACATTGATGTCAATCTG                                                    |
| Kv2.1 motif                  | Forward:<br>TGGACGAGCTGTACAAGCAGAGCCAGCCTATCCTGAACAC<br>Reverse:<br>CGATAAGCTTGATATCGAATTCTTACACTTCATTTTCATAGCAGAA<br>GAACCTGG         |
| P2A-CheRiff                  | Forward: GGCTCCGGAGCCACGAAC<br>Reverse: AGCGTAATCTGGAACATCGTATGGG                                                                      |



**Table S5.** Spectral properties and imaging apparatus for fluorescent imaging

| Indicator              | Fluorophore   | Excitation max. (nm)             | Emission max. (nm)               | Laser (nm) | Emission filter (nm)                                                                  |
|------------------------|---------------|----------------------------------|----------------------------------|------------|---------------------------------------------------------------------------------------|
| Cepheid1b              | mScarlet-I1.4 | 570                              | 600                              | 561        | 630 / 75 (inverted wide-field, confocal)<br>600 / 50 (upright wide-field, dual-color) |
| Cepheid1s              | mRuby4        | 558                              | 592                              | 561        | 630 / 75 (wide-field, confocal)<br>600/50 (dual-color)                                |
| VARNAM(6)              | mRuby3        | 558                              | 592                              | 561        | 630 / 75                                                                              |
| VARNAM2(14)            | mRuby3        | 558                              | 592                              | 561        | 630 / 75                                                                              |
| Ace2N-7aa-mScarlet(26) | mScarlet      | 569                              | 594                              | 561        | 630 / 75                                                                              |
| AceC81-mScarlet-I1.4   | mScarlet-I1.4 | 570                              | 600                              | 561        | 630 / 75                                                                              |
| GCaMP6s(18)            | cpEGFP        | 497<br>(Ca <sup>2+</sup> -bound) | 515<br>(Ca <sup>2+</sup> -bound) | 488        | 525 / 50                                                                              |

Dichroic mirror: Chroma ZT405/488/561/640rpc for confocal imaging and ZT405/488/532/642rpc for inverted wide-field imaging.

ZT561rdc for upright wide-field wide-field imaging. T565LPXR was used to split fluorescence for dual-color imaging.

**Table S6.** Amino acid sequences of Cepheid1b/s and Cepheid1b/s-ST

| Voltage indicator | Amino acid sequence                                                                                                                                                                                                                                                                                                                                                                                                                                                                                                                                                                                                                                                                                                                                                                                                                                                                                                                                                                                                                            | Feature                                                                                                                                                                                                                                                                      |
|-------------------|------------------------------------------------------------------------------------------------------------------------------------------------------------------------------------------------------------------------------------------------------------------------------------------------------------------------------------------------------------------------------------------------------------------------------------------------------------------------------------------------------------------------------------------------------------------------------------------------------------------------------------------------------------------------------------------------------------------------------------------------------------------------------------------------------------------------------------------------------------------------------------------------------------------------------------------------------------------------------------------------------------------------------------------------|------------------------------------------------------------------------------------------------------------------------------------------------------------------------------------------------------------------------------------------------------------------------------|
| Cepheid1b         | <p>MADVETETGMIAQWIVFAIMAAAAIAFGVAVHFRP<br/> SELKSAYYINIAICTIAATAYYAMAVNYQDLTMMVS<br/> KGEAVIKEFMRFKVHMEGSVNGHEFEIEGEGEGR<br/> PYEGTQTAKLKVTKGGPLPFSWDILSPQFMYGSR<br/> AFTKHPADIPDYYKQSFPEGFTWERVMNFEDGGS<br/> VTVTQDTSLEDGTLIYKVKL RGTNFPPDGPVMQKT<br/> TMGWEASTERLYPEDGV LKGDIKMALRLKDGGRY<br/> IADFKTTYKAKKPVQMPGAYNVDRKLDIVSHNEDY<br/> TVVEQYEASVGRHSTGGMDELYKNGERQVVYAR<br/> YICWVLTTPLLLLDLIVMTKMGGVMISWVIGADIFMI<br/> VFGILGAFEDEHKFKWVYFIAGCVMQAVLTYGMY<br/> NATWKDDLKKSPEYHSSYVSL LVFLSILWVFPV<br/> WAFGSGSGVLSVDNEAILMGILDV LAKPLFGMGC<br/> LIAHETIFK<b>TGAADRPVAVSKAAAAS</b>KS<b>RITSEGE</b><br/> <b>YIPLDQIDINVGGKS</b>RITSEGE<b>YIPLDQIDINVGGKS</b><br/> <b>RITSEGEYIPLDQIDINVGG</b>NMAI<b>KEFMRFKVRMEG</b><br/> <b>SVNGHEFEIEGEGEGRPYEGFQTAKLKVTKGGPL</b><br/> <b>PFAWDILSPHFTFGSKAYVKHPADIPDYFKLSFPE</b><br/> <b>GFKWERVMNYEDGGVVTVTQDSSLQDGEFIYKVK</b><br/> <b>LRGTNFPDGPVMQKKTMGWEASSERMYPEDGA</b><br/> <b>LKGKIKMRLKLDGGHYTSEVKTTYKAKKPVQLP</b><br/> <b>GAYIVDIKLDITSHNEDYTIVEQYERAEGRHSTGGM</b><br/> <b>DELYKFCYENEV</b></p> | <p><b>Gray:</b> Ace<sup>C81</sup>(1-68)...(69-227)<br/> <b>Red:</b> mScarlet-I1.4<br/> <b>Black:</b> linker<br/> <b>Blue:</b> transport signal (TS)<br/> <b>Orange:</b> dark mOrange2 (<math>\Delta 7</math>mOrange(Y64F))<br/> <b>Green:</b> ER-exiting sequences (ER2)</p> |

|              |                                                                                                                                                                                                                                                                                                                                                                                                                                                                                                                                                                                                                                                                                                                                                                                                                                                                                                                                                                                                                                                                                                                        |                                                                                                                                                                                                                                                                                                                                                                             |
|--------------|------------------------------------------------------------------------------------------------------------------------------------------------------------------------------------------------------------------------------------------------------------------------------------------------------------------------------------------------------------------------------------------------------------------------------------------------------------------------------------------------------------------------------------------------------------------------------------------------------------------------------------------------------------------------------------------------------------------------------------------------------------------------------------------------------------------------------------------------------------------------------------------------------------------------------------------------------------------------------------------------------------------------------------------------------------------------------------------------------------------------|-----------------------------------------------------------------------------------------------------------------------------------------------------------------------------------------------------------------------------------------------------------------------------------------------------------------------------------------------------------------------------|
| Cepheid1s    | <p>MADVETETGMIAQWIVFAIMAAAAIAFGVAVHFRP<br/> SELKSAYYINIAICTIAATAYYAMAVNYQDLT<b>MLIKE</b><br/> <b>EMPMKVVMTGTVNGHYFKCTGEGEGRPYEGVQT</b><br/> <b>MRIKVIIEGGPLPFAFDILATSFMYGSRTFIKYPADIP</b><br/> <b>DFFKQSFPEGFTWERVTRYEDGGVVTVTQDTSLQ</b><br/> <b>DGVLIIYVVKVRGENFPSNGPVMQKKTGWEPNTE</b><br/> <b>MMYPADGGLRGYTDIALKVDGGGHLHCSFVTEYK</b><br/> <b>SKKTVGNIKMPGVHAVDHRLERIEESDNETYVVQR</b><br/> <b>EVAVAKYSNLGGGMDELYKNGERQVVYARYICW</b><br/> VLTTPLLLLLDLIVMTKMGGVMISWVIGADIFMIVFGI<br/> LGAFEDHFKFWVYFIAGCVMQAVLTYGMYNAT<br/> WKDDLKKSPEYHSSYVSLLVFLSILWVFPVWAF<br/> GSGSGVLSVDNEAILMGILDVLA KPLFGMGCLIAH<br/> ETIFK<b>TGAADRPVVAVSKAAAAS</b><b>KS</b><b>RITSEGEYIPL</b><br/> <b>DQIDINVGGKS</b><b>RITSEGEYIPLDQIDINVGGKS</b><b>RITS</b><br/> <b>EGEYIPLDQIDINVGG</b><b>NMAIIKEFMRFKVRMEGSVN</b><br/> <b>GHEFEIEGEGEGRPYEGFQTA KLKVT KGGPLPFA</b><br/> <b>WDILSPHFTFGSKAYVKHPADIPDYFKLSFPEGFK</b><br/> <b>WERVMNYEDGGVVTVTQDSSLQDGEFIYKVKLRG</b><br/> <b>TNFPDGPVMQKKTMGWEASSERMYPEDGALKG</b><br/> <b>KIKMRLKLDGGHYTSEVKT TYKAKKPVQLPGAYI</b><br/> <b>VDIKLDITSHNEDYTIVEQYERA EGRHSTGGMDEL</b><br/> <b>YKFCYENEV</b></p> | <p><b>Gray:</b> Ace<sup>C81</sup>(1-68)...(69-227)<br/> <b>Red:</b> mRuby4<br/> <b>Black:</b> linker<br/> <b>Blue:</b> transport signal (TS)<br/> <b>Orange:</b> dark mOrange2 (<math>\Delta 7mOrange(Y64F)</math>)<br/> <b>Green:</b> ER-exiting sequences (ER2)</p>                                                                                                       |
| Cepheid1b-ST | <p>MADVETETGMIAQWIVFAIMAAAAIAFGVAVHFRP<br/> SELKSAYYINIAICTIAATAYYAMAVNYQDLT<b>MVS</b><br/> <b>KGEAVIKEFMRFKVHMEGSVNGHEFEIEGEGEGR</b><br/> <b>PYEGTQTA KLKVT KGGPLPFSWDILSPQFMYGSR</b><br/> <b>AFTKHPADIPDYYKQSFPEGFTWERVMNFEDGGS</b><br/> <b>VTVTQDTSLEDGTLIYKVKLRGTNFPDGPVMQKT</b><br/> <b>TMGWEASTERLYPEDGV LKGDIKMALRLKDGGRY</b><br/> <b>IADFKTTYKAKKPVQMPGAYNVDRKLDIVSHNEDY</b><br/> <b>TVVEQYEASVGRHSTGGMDELYK</b><b>NGERQVVYAR</b><br/> YICWVLTTPLLLLLDLIVMTKMGGVMISWVIGADIFMI<br/> VFGILGAFEDHFKFWVYFIAGCVMQAVLTYGMY<br/> NATWKDDLKKSPEYHSSYVSLLVFLSILWVFPVW<br/> WAFGSGSGVLSVDNEAILMGILDVLA KPLFGMGC<br/> LIAHETIFK<b>TGAADRPVVAVSKAAAAS</b><b>KS</b><b>RITSEGE</b><br/> <b>YIPLDQIDINVGGKS</b><b>RITSEGEYIPLDQIDINVGGKS</b><br/> <b>RITSEGEYIPLDQIDINVGG</b><b>NMAIIKEFMRFKVRMEG</b><br/> <b>SVNGHEFEIEGEGEGRPYEGFQTA KLKVT KGGPL</b><br/> <b>PFAWDILSPHFTFGSKAYVKHPADIPDYFKLSFPE</b></p>                                                                                                                                                                                                                    | <p><b>Gray:</b> Ace<sup>C81</sup>(1-68)...(69-227)<br/> <b>Red:</b> mScarle-l1.4<br/> <b>Black:</b> linker<br/> <b>Blue:</b> transport signal (TS)<br/> <b>Orange:</b> dark mOrange2 (<math>\Delta 7mOrange(Y64F)</math>)<br/> <b>Brown:</b> somatic targeting (ST) domain from the voltage-gated potassium channel Kv2.1<br/> <b>Green:</b> ER-exiting sequences (ER2)</p> |

|                          |                                                                                                                                                                                                                                                                                                                                                                                                                                                                                                                                                                                                                                                                                                                                                                                                                                                                                                                                                                                                                      |                                                                                                                                                                                                                                                                                                                      |
|--------------------------|----------------------------------------------------------------------------------------------------------------------------------------------------------------------------------------------------------------------------------------------------------------------------------------------------------------------------------------------------------------------------------------------------------------------------------------------------------------------------------------------------------------------------------------------------------------------------------------------------------------------------------------------------------------------------------------------------------------------------------------------------------------------------------------------------------------------------------------------------------------------------------------------------------------------------------------------------------------------------------------------------------------------|----------------------------------------------------------------------------------------------------------------------------------------------------------------------------------------------------------------------------------------------------------------------------------------------------------------------|
|                          | <p>GFKWERVMNYEDGGVVTVTQDSSLQDGEFIYKVK<br/> LRGTNFPDGPVMQKKTMGWEASSERMYPEDGA<br/> LKGKIKMRLKLDGGHYTSEVKTTYKAKKPVQLP<br/> GAYIVDIKLDITSHNEDYTIVEQYERAEGRHSTGGM<br/> DELYKQSQPILNTKEMAPQSKPPEELEMSSMPSP<br/> VAPLPARTEGVIDMRSMSSIDSFISCATDFPEATRF<br/> FCYENEV</p>                                                                                                                                                                                                                                                                                                                                                                                                                                                                                                                                                                                                                                                                                                                                                      |                                                                                                                                                                                                                                                                                                                      |
| <p>Cepheid1s-<br/>ST</p> | <p>MADVETETGMIAQWIVFAIMAAAAIAFGVAVHFRP<br/> SELKSAYYINIAICTIAATAYYAMAVNYQDLTMLIKE<br/> EMPMKVVMGTGVNGHYFKCTGEGEGRPYEGVQT<br/> MRIKVIEGGPLPFAFDILATSFMYGSRTFIKYPADIP<br/> DFFKQSFPEGFTWERVTRYEDGGVVTVTQDTSLQ<br/> DGVLIYNVKVRGENFPSNGPVMQKKTGWEPNTE<br/> MMYPADGGLRGYTDIALKVDGGGHLHCSFVTEYK<br/> SKKTVGNIKMPGVHAVDHLERIEESDNETYVVQR<br/> EVAVAKYSNLGGGMDELYKNGERQVVYARYICW<br/> VLTTPLLLLDLIVMTKMGGVMISWVIGADIFMIVFGI<br/> LGAFEDHKFKWVYFIAGCVMQAVLTYGMYNAT<br/> WKDDLKKSPEYHSSYVLLVFLSILWVFPVWAF<br/> GSGSGLSVDNEAILMGILDVLA KPLFGMGCLIAH<br/> ETIFKTGAADRPVAVSKAAAASKSRITSEGEYIPL<br/> DQIDINVGGKSRTSEGEYIPLDQIDINVGGKSRTS<br/> EGEYIPLDQIDINVGGNMAIIEFMRFKVRMEGSVN<br/> GHEFEIEGEGEGRPYEGFQTAKLKVTKGGPLPFA<br/> WDILSPHFTFGSKAYVKHPADIPDYFKLSFPEGFK<br/> WERVMNYEDGGVVTVTQDSSLQDGEFIYKVKLRG<br/> TNFPDGPVMQKKTMGWEASSERMYPEDGALKG<br/> KIKMRLKLDGGHYTSEVKTTYKAKKPVQLPGAYI<br/> VDIKLDITSHNEDYTIVEQYERAEGRHSTGGMDEL<br/> YKQSQPILNTKEMAPQSKPPEELEMSSMPSPVAP<br/> LPARTEGVIDMRSMSSIDSFISCATDFPEATRF<br/> FCYENEV</p> | <p>Gray: Ace<sup>C81</sup>(1-68)...(69-227)<br/> Red: mRuby4<br/> Black: linker<br/> Blue: transport signal (TS)<br/> Orange: dark mOrange2 (<math>\Delta 7mOrange(Y64F)</math>)<br/> Brown: somatic targeting (ST) domain from the voltage-gated potassium channel Kv2.1<br/> Green: ER-exiting sequences (ER2)</p> |
